# Supplementary material for: Robust gene silencing mediated by antisense small RNAs in the pathogenic protist Entamoeba histolytica
Source: PubMed Central journal article supplement — Nucleic Acids Res. 2013 Aug 9;41(20):9424–37. doi: 10.1093/nar/gkt717 (PMC3814356; doi:10.1093/nar/gkt717), 2013-08-09
Supplement: supp_gkt717_nar-01058-a-2013-File004.pdf [file supp_gkt717_nar-01058-a-2013-File004.pdf]

## **Supplemental material**

### **Figure Legends**

#### **Figure S1: Schematic of the antisense small RNAs that map to the EHI\_197520 gene.**

471 unique sRNAs map antisense (AS) to the coding-region of EHI\_197520 with a 5'-distribution bias. The EHI\_197520 gene length is 1233bp; in orange and green are the areas designated as the 5' trigger and 3' trigger, respectively.

**Figure S2: Schematic of constructs used.** **(A)** The first 132bp of the coding regions of genes (EHI\_197520, EHI\_048600, and EHI\_025700) are cloned downstream of their endogenous promoter and fused to the firefly luciferase gene. **(B)** Shorter sections (102bp, 75bp, 48bp) of EHI\_197520 coding region are cloned downstream of the EHI\_197520 endogenous promoter and fused to the firefly luciferase gene. **(C) (i)** The first 132bp of the coding regions of genes (EHI\_197520, EHI\_048600, and EHI\_025700) are cloned downstream of the cysteine synthase (CS) promoter and fused to the firefly luciferase gene. **(ii)** The first 132bp of the coding region of EHI\_197520 is fused to the 3'-end of the luciferase gene. **(D) (i)** The last 132bp of the coding region of the EHI\_197520 gene is cloned downstream of the CS promoter and fused to the firefly luciferase gene. **(ii)** The last 450bp of the coding region of EHI\_197520 is fused to the 5'-end of the luciferase gene. **(iii)** The last 132bp of the coding region of EHI\_197520 is fused to the 3'-end of the luciferase gene. **(E)** Constructs used to generate the stable cell lines with the 132bp EHI\_197520-trigger fused to the 5'-end of the full-length genes **(i)** EhROM1, EhAgo2-1, EhAgo2-2, EhAgo2-3, EhRdRP1 and EhRNaseIII **(ii)** EhMyb **(iii)** EhROM1 but lacking a promoter **(iv)** the last 450bp of the coding region of EHI\_197520 is fused to the 5'-end of the EhROM1 gene. **(v)** Constructs used to evaluate stable cell lines for functional AS sRNAs. They contain either 132bp of EhROM1, 132bp of EhROM1 recoded or 132bp of EhAgo2-2 as a "trigger" and are cloned downstream of the CS promoter and fused to the firefly luciferase gene **(F) (i)** The Firefly luciferase gene with no promoter. **(ii)** The Firefly luciferase gene driven by the CS promoter. **(iii)** The Renilla luciferase gene driven by the CS promoter.

**Figure S3: EhROM1 silencing is specific and maintained after drug selection is removed.** Evaluation of *E. histolytica* HM-1:IMSS parasites stably transfected with the 19 trigger-ROM construct with and without drug pressure. EhROM1 mRNA level and EhROM AS sRNA abundance was analyzed after two and three month of drug release. **(A)** RT-PCR of the 19 trigger-ROM and untransfected cell lines reveals that the EhROM1 knockdown persists two months after plasmid removal. **(B)** RT-PCR of the 19 trigger-ROM and untransfected cell lines showed that the EhROM1 knockdown also persists three months after plasmid removal. RT-PCR of the EHRM2 gene (EHI\_060330, 56% sequence identity) showed unaffected mRNA level under all conditions tested.

### **Table legends**

#### **Table S1: Genes with strain-specific patterns of sRNA and mRNA abundance.**

Genes selected that have abundant antisense small RNAs and low mRNA abundance in a strain-specific manner for *E. histolytica* strains HM-1:IMSS and Rahman. The selection was based on microarray data (1,2) and the sRNA library of HM-1:IMSS and Rahman (3). For all genes the number of unique AS sRNAs is indicated. For the gene EHI\_197520 AS sRNAs were detected in HM-1:IMSS (see Figure SM1 for schematic) and no mRNA expression (mRNA expression value: 0.07). For the same gene no sRNA were detected in the Rahman strain, but mRNA expression was detected (mRNA expression value: 6.75). For the gene EhSTIRP/EHI\_025700 AS sRNAs were detected in Rahman but no mRNA expression (mRNA expression value: 0.05). For the same gene no sRNAs in the HM-1:IMSS strain, but mRNA expression was detected (mRNA expression value: 28.0). For the gene EHI\_048600 AS sRNAs were detected in HM-1:IMSS and Rahman and no mRNA expression is detected in either strain (mRNA expression value: HM-1:IMSS 0.04; Rahman 0.04). RNA sequencing results showed that a conserved EHI\_048600 gene is moderately expressed in *E. invadens* (G. Ehrenkauffer, N. Hall and U. Singh; unpublished data). N/A is not available.

**Table S2: Primer for Construct cloning.** All cloning primers used in this study are listed.

Restriction enzymes in the primer cloning sites are mentioned in the name of the primer and highlighted in bold in the primer sequence.

**Table S3: Primer for Northern Blot.** All primers used for Northern Blot analyses are listed.

**Table S4: Primer for RT-PCR.** All primers used for RT-PCR are listed.

1. MacFarlane, R.C. and Singh, U. (2006) Identification of differentially expressed genes in virulent and nonvirulent *Entamoeba* species: potential implications for amebic pathogenesis. *Infect Immun*, **74**, 340-351.
2. Vicente, J.B., Ehrenkaufer, G.M., Saraiva, L.M., Teixeira, M. and Singh, U. (2009) *Entamoeba histolytica* modulates a complex repertoire of novel genes in response to oxidative and nitrosative stresses: implications for amebic pathogenesis. *Cellular microbiology*, **11**, 51-69.
3. Zhang, H., Ehrenkaufer, G.M., Hall, N. and Singh, U. (2013) Small RNA pyrosequencing in the protozoan parasite *Entamoeba histolytica* reveals strain-specific small RNAs that target virulence genes. *BMC Genomics*, **14**, 53.

**Figure S1**

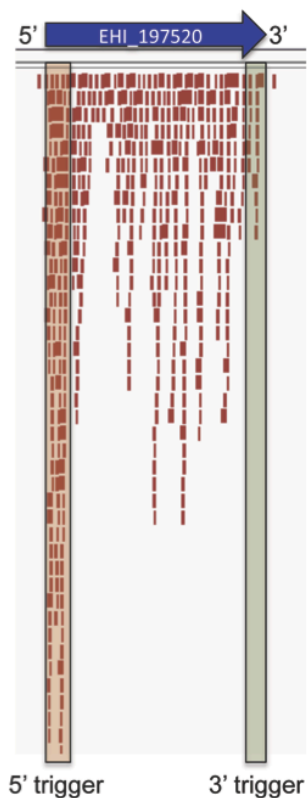

**Figure S2**

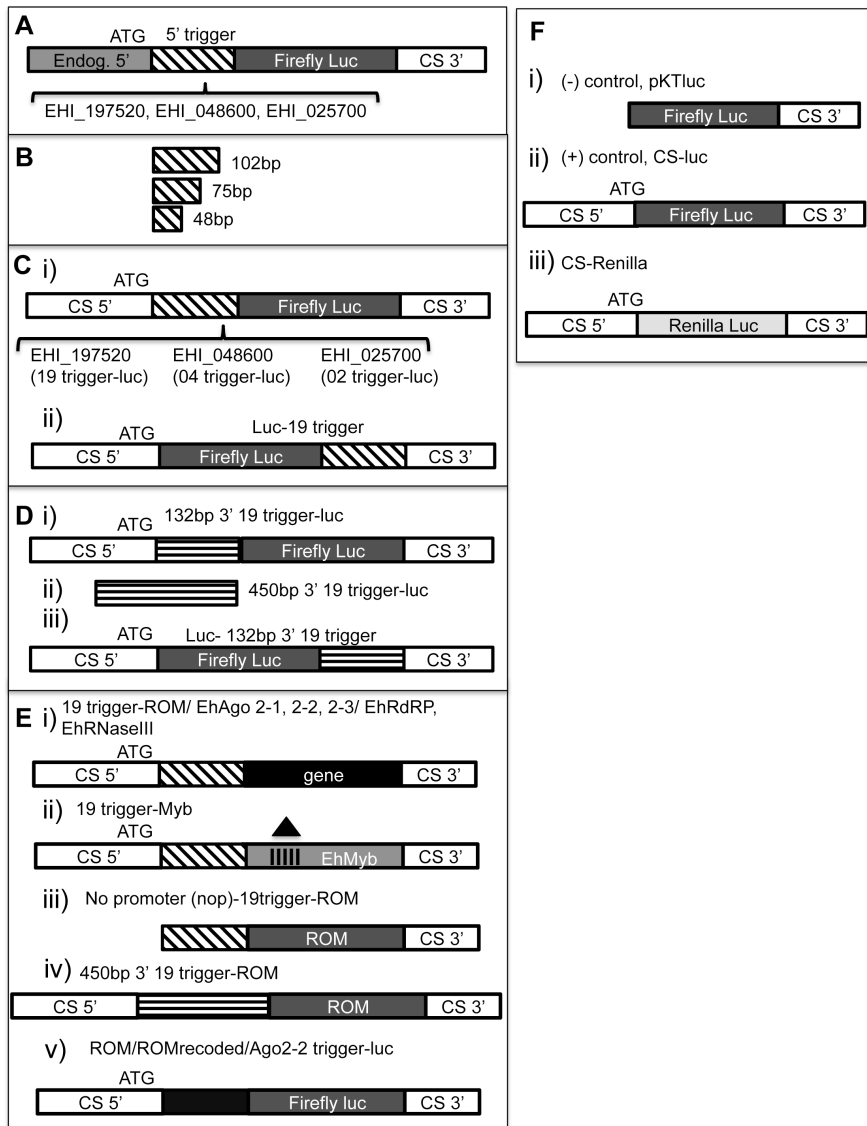

**Figure S3**

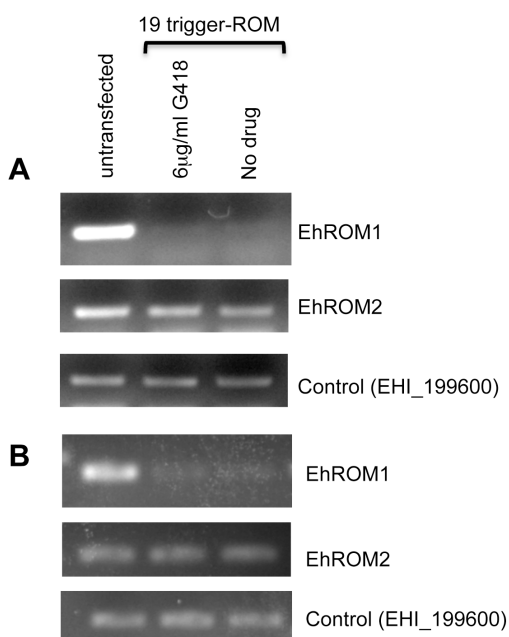

|                                                   |                              |                                         |                                                                               |                                         |
|---------------------------------------------------|------------------------------|-----------------------------------------|-------------------------------------------------------------------------------|-----------------------------------------|
| <i>Entamoeba</i><br>species and<br>strains        |                              | EHI_197520<br>(Hypothetical<br>protein) | EHI_025700<br>(Serine,Threonine,<br>and Isoleucine rich<br>protein (EhSTIRP)) | EHI_048600<br>(Hypothetical<br>protein) |
| <i>E. histolytica</i><br>HM-1:IMSS<br>(virulent)  | # of unique AS<br>small RNAs | 484                                     | 5                                                                             | 684                                     |
|                                                   | mRNA<br>expression           | not detectable                          | high                                                                          | not detectable                          |
| <i>E. histolytica</i><br>Rahman (non<br>virulent) | # of unique AS<br>small RNAs | zero                                    | 602                                                                           | 89                                      |
|                                                   | mRNA<br>expression           | medium                                  | not detectable                                                                | not detectable                          |
| <i>E. invadens</i> IP-1                           | # of unique AS<br>small RNAs | N/A                                     | N/A                                                                           | N/A                                     |
|                                                   | mRNA<br>expression           | N/A                                     | N/A                                                                           | medium                                  |

**Table S1**

**Table S2**

|                                  |                                    |
|----------------------------------|------------------------------------|
| 048600promoter-HindIII-s         | ACAAAGCTTTGGTGTCTCCTGTAATGCA       |
| 048600promoter-AvrII-as          | ACACCTAGGTTGTTATATTTAGAATTATTAGT   |
| 048600-21bp-AvrII-as             | ACACCTAGGGAGGGTTAATTCAATTTCCA      |
| 048600-132bp-AvrII-as            | ACACCTAGGCGTTGATGCTGCAATTTTTGT     |
| 132bpof04-AvrII-s                | ACACCTAGGATGGAAATTGAATTAACCCT      |
| 025700promoter-HindIII-s         | ACAAAGCTTTTGATACTTCGTTATTCTAAAATA  |
| 025700promoterplus21-AvrII-as    | ACACCTAGGTATTAACAATCTTTTGACATACA   |
| 025700promoterplus132bp-AvrII-as | ACACCTAGGATTTGTATTTTCATTGTTCTCTTCA |
| 025700-AvrII-s                   | ACACCTAGGATGTCAAAGATTGTTTAATAAACT  |
| 197520promoter-HindIII-s         | ACAAAGCTTCCTTATTTCAATCTTTCTTTTTCT  |

|                                |                                       |
|--------------------------------|---------------------------------------|
| 197520promoter-AvrII-as        | ACACCTAGGGAATAAATAAATGAATCTTGA        |
| 197520+21-AvrII-as             | ACACCTAGGAGTTGGTTGAGCTGAAGACAT        |
| 197520promoter+132-AvrII-as    | ACACCTAGGAGTTCCAGTACTTACTGGT          |
| 197520-132bp-AvrII-s           | ACACCTAGGATGTCTTCAGCTCAACCAACT        |
| 197520+ 48bp-AvrII-as          | ACACCTAGGGTATTGAGGTTGATTAGAATTAGT     |
| 197520+75bp-AvrII-as           | ACACCTAGGATATTGTTGATTTGCTGCATCA       |
| 197520+102bp-AvrII-as          | ACACCTAGGCATTGACTGTTGAATAGGA          |
| 197520-XhoI-s                  | ACACTCGAGATGTCTTCAGCTCAACCAACT        |
| 197520+132-XhoI-as             | ACACTCGAGTTAAGTTCCAGTACTTACTGGT       |
| Luc-s                          | ACACCTAGGATGGAAGACGCCAAAAACA          |
| Luc-as noSTOP-XhoI             | ACACTCGAGCAATTTGGACTTTCCGCCCT         |
| 197520+132-SmaI-as             | ACAGTCGACTTAAGTTCCAGTACTTACTGGT       |
| 197520-3`-132bp-XhoI-s         | ACACTCGAGGGAGCACCAAGATTTGATCA         |
| 197520-3`-132bp-XhoI-as        | ACACTCGAGTTAAAAACCAGAGCCATAACT        |
| 197520-3`-132bp-noStop-AvrII-s | ACACCTAGGGGAGCACCAAGATTTGATCA         |
| 197520-3`-450bp-AvrII-s        | ACACCTAGGGTTCAACAACAAATGACTAATGCT     |
| ROMrec-132bp-AvrII-s           | ACACCTAGGATGCACTCCCCACACAACAACATCCACA |
| ROMrec-132bp-AvrII-as          | ACACCTAGGGGCCTTGCGGGTGCTGGT           |
| ROM-AvrII-s                    | ACACCTAGGATGCATTCTCCACCACATAACA       |
| ROM-132bp-AvrII-as             | ACACCTAGGTTTAGCTGTTGAAGTAGGTGT        |
| EHI_197980-s                   | ACACCCGGGATGAGTGTCACTCTTTC            |
| EHI_197980 -as                 | ACACTCGAGTCAAATCAATGCTTGATTG          |

**Table S3**

|                                 |                                |
|---------------------------------|--------------------------------|
| Luciferase AS sRNAs             | AGGCCCGGCGCCATTCTATCCTCTAGAGG  |
| EhROM1 AS sRNAs                 | ATGGATGATGATAGAGAACCAACACCTACT |
| EhMyb AS sRNAs                  | ATGAGTGTCACTCTTTCTTCTACTGAAAAT |
| EhMyb AS sRNAs to the intron    | GTTTCTTAGTGTCTTTTAAACCCCTTAAA  |
| EhMyb AS sRNAs after the intron | TATTCAAACAACACTGGAGGAATTAACAAA |
| EhROM1 mRNA                     | TTCACCTTCCAGGCATTCTC           |

**Table S4**

|                 |                           |
|-----------------|---------------------------|
| ROM1-RTs        | GGGAGACATGAGGTTTCGAGT     |
| ROM1-RT-as      | GGTGAACATGGTGGTGAAT       |
| Eh_199600-s     | ACGTCATGCTGAATTTGCTG      |
| Eh_199600-as    | CCTTTAAGCCCAGCCTTTCT      |
| EhMybRT-s       | CGAATTTACAAAACAAATTGAGATG |
| EhMybRT-as      | CAATGCTTGATTGAAAAATGGA    |
| ROM-060330RT-s  | CCAATTGTTTGGGTCCAAC       |
| ROM-060330RT-as | GGAAGAATCCTATTTGCCATT     |
